# Supplementary material
Source: PubMed Central journal article supplement (PMC4081748)

## Supplements Index

1. A list of names of Type 2 Diabetes medications used in this study
2. **Supplement Figure S1:** Histogram of the count of HbA1c measures per patient
3. **Supplement Figure S2:** Histogram of HbA1c among 26,120 EHR patients and among 1,761 clinical trials
4. **Supplement Figure S3:** Histogram of age among 26,120 EHR patients and among 1,761 clinical trials

## Supplement 1: Type 2 Diabetes Medication List Used for this Study

insulin  
chlorpropamide [Diabinese] [diabanase][diabinase];  
glipizide [glucotrol] [glucotrol XL][glucatorl];  
glyburide [Micronase] [Glynase] [Diabetamide] [Diabeta];  
glimepiride [Amaryl];  
repaglinide [Prandin];  
nateglinide [Starlix];  
metformin [Glucophage];  
rosiglitazone [Avandia];  
pioglitazone [ACTOS];  
acarbose [Precose];  
miglitol [Glyset];  
sitagliptin [Januvia];  
exenatide [Byetta];  
tolazamide [tolinase];  
acetohexamide [dymelor];  
troglitazone [rezulin];  
tolbutamide [Orinase · Orinase Diagnostic · Tol-Tab]  
Metaglip;  
Glucovance;  
Actoplus Met [Actoplusmet];  
Avandamet;  
Janumet;  
Avandaryl;  
Fortamet;  
Glumetza;  
Riomet;  
glucophage xr;  
prandimet

## References

- Kho AN, Hayes MG, Rasmussen-Torvik L, Pacheco JA, Thompson WK, Armstrong LL, et al. Use of diverse electronic medical record systems to identify genetic risk for type 2 diabetes within a genome-wide association study. *J Am Med Inform Assoc.* 2012;19(2):212-8.
- Ritchie MD, Denny JC, Crawford DC, Ramirez AH, Weiner JB, Pulley JM, et al. Robust replication of genotype-phenotype associations across multiple diseases in an electronic medical record. *Am J Hum Genet.* 2010;86(4):560-72.

Supplement Figure S1: Histogram for the numbers of HbA1c measures per patient

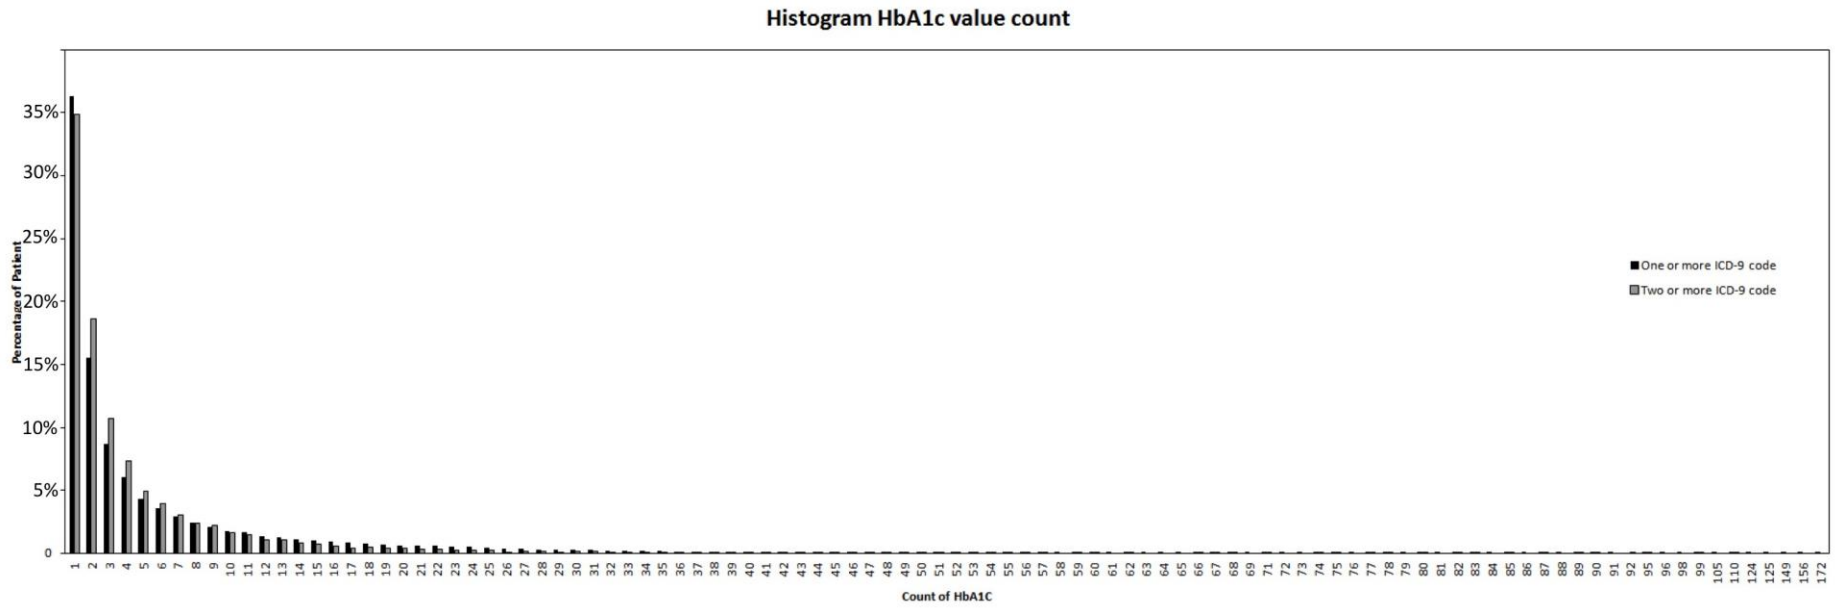

Supplement Figure S2: Histogram of HbA1c among 26,120 EHR patients and among 1,761 clinical trials

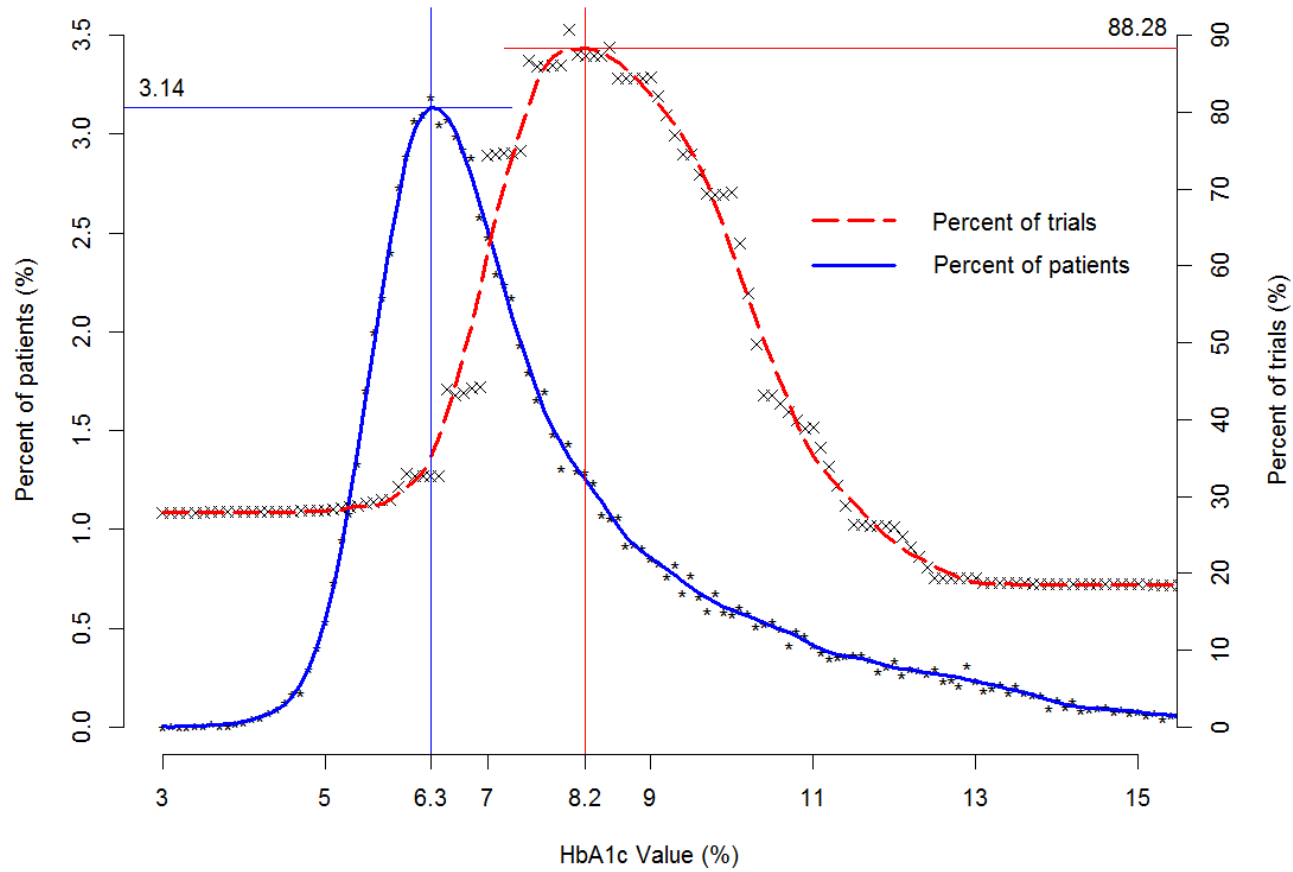

Supplement Figure S3: Histogram of age among 26,120 EHR patients and among 1,761 clinical trials

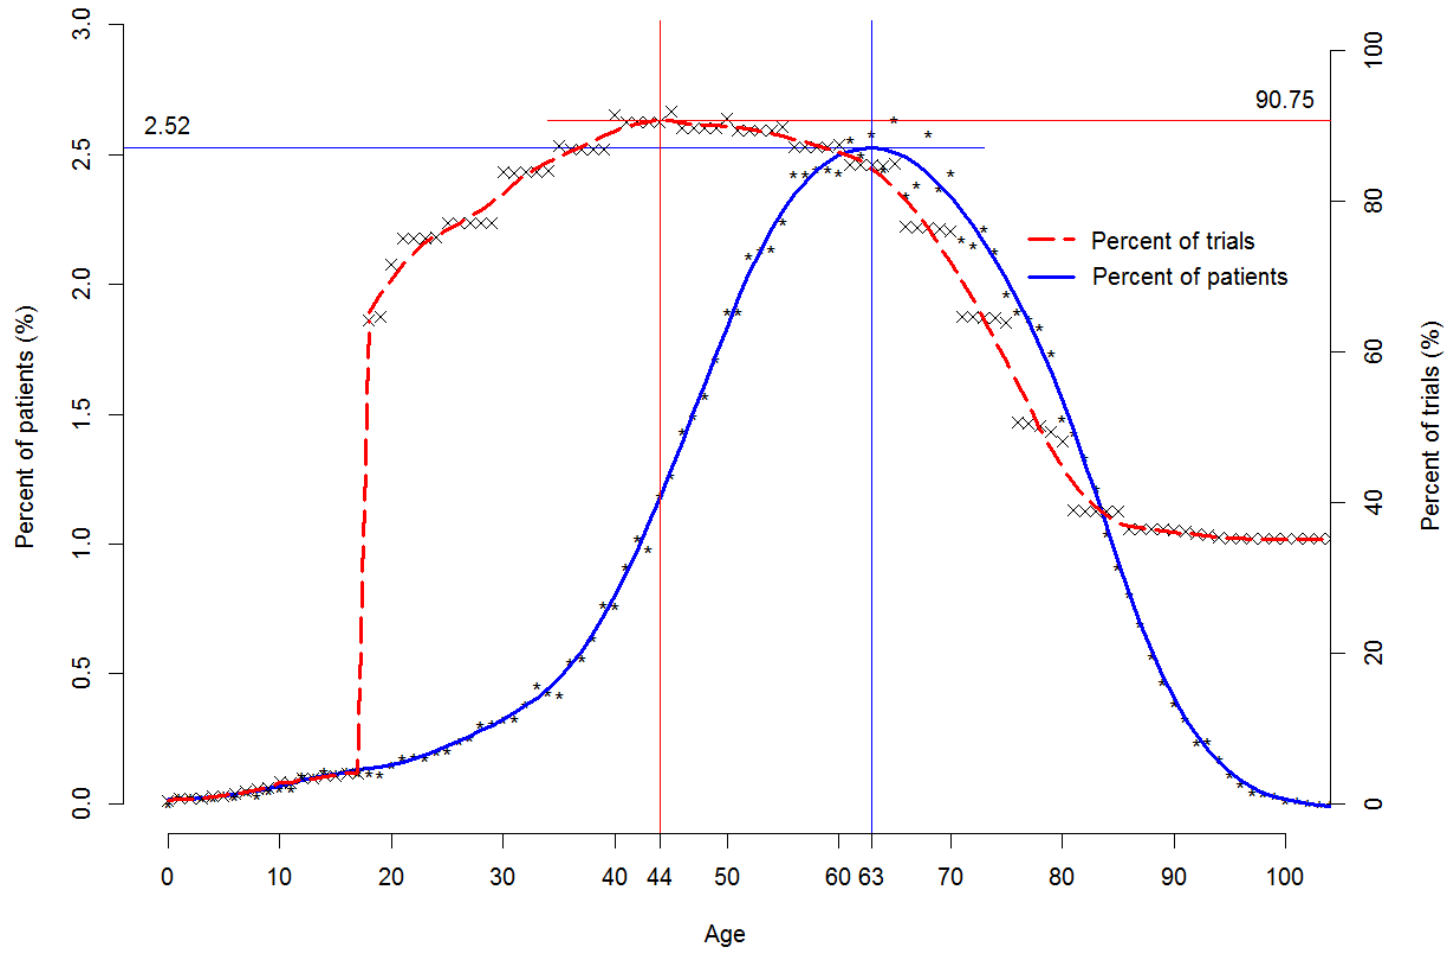

Supplement: ACI-05-0463-s001.pdf [file ACI-05-0463-s001.pdf]
